# Supplementary material
Source: PubMed Central journal article supplement (PMC2745394)
Supplement: NIHMS134189-supplement-supplementary_Data.pdf [file NIHMS134189-supplement-supplementary_Data.pdf]

## Suppl Table 1

|         | M+H+     | MS <sup>1</sup> | MS <sup>2</sup> |
|---------|----------|-----------------|-----------------|
|         | measured | m/z             | m/z             |
| ADH     | 1085.8   | 542.9           | 534.3           |
| Ang I   | 1297.8   | 649.4           | 784.4           |
| Ang II  | 1048.0   | 524.2           | 784.4           |
| Ang 1-7 | 899.7    | 450.5           | 784.4           |
| KD      | 1189.1   | 595.3           | 904.4           |
| BK      | 1060.6   | 531.2           | 522.3           |
| BK 1-8  | 905.2    | 453.0           | 642.3           |
| BK 2-9  | 905.7    | 453.0           | 807.4           |

**Supplementary Table 1 | MS parameters for the peptides analyzed in this study.** The measured mass value (M+H+) of each peptide was provided by the supplier (AnaSpec; San Jose, CA). The MS<sup>1</sup> values are the predominant parent ion determined by us under the conditions used in these studies. The MS<sup>2</sup> values listed are those used to generate extracted ion chromatograms and signal intensity analyses.

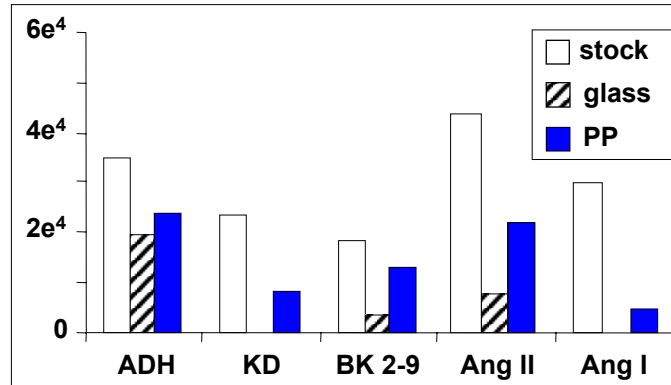

**Supplementary Figure 1 | Adsorption of peptides to glass & polypropylene.** A comparison of peptide recovery from stock standards mix versus equimolar injections from samples prepared in glass or polyethylene vial inserts. A peptide standard mix was prepared in LB vial (500 ml;  $[10^{-10}\text{M}]$ ). The “stock” sample consisted of 200  $\mu\text{l}$  of  $[10^{-10}\text{M}]$  peptide mix transferred directly to a PP vial insert on the day of analysis. Glass and PP samples consisted of 20  $\mu\text{l}$  of the  $[10^{-10}\text{M}]$  stock transferred to the vial inserts and diluted 10 fold before lyophilization and reconstitution, thereby exposing analytes to the full surface area of the vial insert with a solution approximating endogenous plasma concentrations of each peptide. Replicate injections of 8.0  $\mu\text{l}$  were analyzed (theoretically 0.8 fmol injected on column).

## Suppl. Fig 2

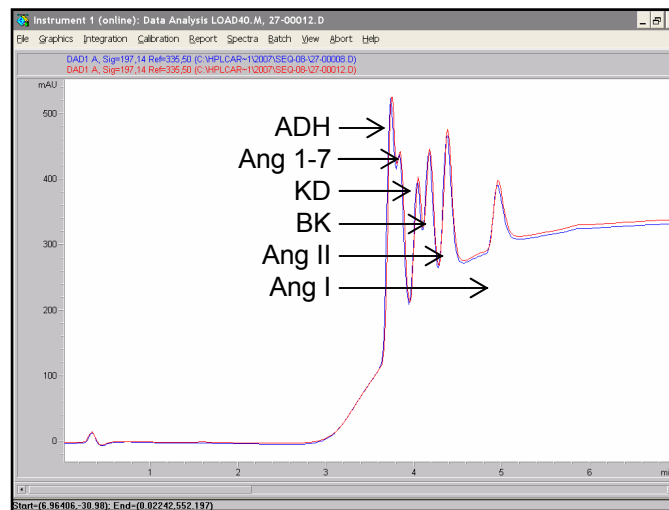

**Supplementary Figure 2 | Offline HPLC fractionation of vasoactive peptides.** A chromatogram showing the elution of peptides from a standard mix ( $10^{-6}M$ ) using diode array UV detection. Establishing the elution times enabled the collection of endogenous low abundance peptides from plasma and standards for LC-MS analysis. Chromatographic resolution of each peptide was forgone to enable collection of peptides of interest in a single low volume fraction.

**SUPPLEMENTARY DATA:**

**{Insert Suppl Table, Suppl fig 1 & 2}**

**- Agilent XCT Ultra ion trap MS parameters:**

|                    |                   |
|--------------------|-------------------|
| Mass Range Mode    | Ultra scan        |
| Ion Polarity       | Positive          |
| Ion Source Type    | Chip ESI          |
| Dry Temp           | 325°C             |
| Nebulizer          | 2.0 PSI           |
| Dry Gas            | 5.0 l/min         |
| Trap Drive         | 85.0              |
| Octopole RF Amp    | 108.9 Vpp         |
| Capillary Exit     | 99.0 V            |
| Skimmer            | 30.0 V            |
| Oct 1 DC           | 12.0 V            |
| Oct 2 DC           | 1.7 V             |
| Scan Begin         | 400 m/z           |
| Scan End           | 950 M/z           |
| Averages           | 1 spectra         |
| Max Accu time      | 0.5 sec           |
| (smart) ICC Target | $0.5 \times 10^6$ |
| ICC                | on                |

**SUPPLEMENTARY METHODS:**

Additional details describing the preparation of standards and samples are listed according to the figures presented for each experiment.

**Figure 2;** A frozen aliquot of pure peptide [ $10^{-6}$ M] was diluted 10x with water. Two vial inserts received either 2 or 20  $\mu$ l of peptide and were diluted with water to a final volume of 200  $\mu$ l. Replicate serial injections of 0.01, 0.1, 1.0  $\mu$ l from each vial were analyzed.

**Figure 3;** A mix of peptides was prepared in a LB vial by adding 10  $\mu$ l of each peptide aliquot stock and diluting with water to a final volume of 1.0 ml [ $10^{-8}$ M]. 20  $\mu$ l was transferred to a PP vial insert diluted 10x for replicate injections of 1.0  $\mu$ l.

**Figure 4;** An equal volume of methanol and thawed plasma (200  $\mu$ l vol:vol) was mixed and refrigerated overnight at 4°C in a LB vial. After centrifugation to separate denatured protein, 300  $\mu$ l of supernatant was subject to 10k MW cutoff spin filtration. Aliquots of the filtrate (100  $\mu$ l) were transferred to PP sample vial inserts for lyophilization +/- addition of a standards mix (10  $\mu$ l;  $10^{-10}$ M). Lyophilized samples were reconstituted in 10  $\mu$ l water, providing a 5x concentrated extract, replicate injections of 1.0  $\mu$ l were analyzed.

**Figure 5; A)** A peptide standards mix was prepared as described above (1.0 ml; [ $10^{-9}$ M]). Two separate PP vial inserts received either 2 or 20  $\mu$ l of the mix and were diluted to a final volume of 200  $\mu$ l with water before lyophilization. Each was reconstituted to 20  $\mu$ l with water and repeated graded injections of 0.2, 0.4 & 0.8  $\mu$ l or 2.0, 4.0 & 8.0  $\mu$ l ensued. **B)** A [ $10^{-8}$ M] stock peptide mix was prepared in a LB vial as above. A PP vial insert received 20  $\mu$ l of the mix and was diluted 10 fold with water. Off-line reverse phase HPLC fractionation was used to process 20  $\mu$ l of the standards mix. The collected elution fraction (250  $\mu$ l; directly into PP vial inert) was lyophilized and reconstituted in 20  $\mu$ l of "eluent A". Replicate, graded injections of 0.2, 0.6 and 0.8  $\mu$ l were analyzed.

**Figure 6;** Thawed plasma was spin-filtered (10k MW cutoff) into LB vials and 50  $\mu$ l was transferred to a PP vial insert. Off-line HPLC fractionation was used to process 45  $\mu$ l of filtered plasma. After Lyophilization, plasma peptides were reconstituted in 4.5  $\mu$ l of "eluent A" and replicate 2  $\mu$ l injections were analyzed.
